# Supplementary material for: Evidence for a reactive (alkene)peroxoiridium(iii) intermediate in the oxidation of an alkene complex with O2
Source: Royal Society of Chemistry journal article supplement (doi:10.1039/c2cc17332h), 2012-01-01
Supplement: c2cc17332h.pdf [file c2cc17332h.pdf]

## Electronic Supplementary Information

### Evidence for a reactive (alkene)peroxoiridium(III) intermediate in the oxidation of an alkene complex with O<sub>2</sub>

Matthew R. Kelley and Jan-Uwe Rohde\*

Department of Chemistry, The University of Iowa, Iowa City, IA 52242

| Contents                                                                                                                                                                | Page |
|-------------------------------------------------------------------------------------------------------------------------------------------------------------------------|------|
| Experimental Procedures                                                                                                                                                 | S2   |
| References                                                                                                                                                              | S4   |
| Figure S1. <sup>1</sup> H, <sup>1</sup> H COSY spectrum of <b>2</b>                                                                                                     | S4   |
| Figure S2. <sup>1</sup> H, <sup>13</sup> C HSQC spectrum of <b>2</b>                                                                                                    | S5   |
| Table S1. <sup>1</sup> H and <sup>13</sup> C chemical shifts from the <sup>1</sup> H, <sup>13</sup> C HSQC spectrum of <b>2</b>                                         | S5   |
| Figure S3. IR spectra of <b>1</b> , <b>2</b> , <b>2</b> - <sup>18</sup> O <sub>2</sub> , and the decay products of <b>2</b> and <b>2</b> - <sup>18</sup> O <sub>2</sub> | S6   |
| Determination of the Self-Diffusion Coefficients of <b>1</b> and <b>2</b>                                                                                               | S7   |
| Figure S4. Plots of ln(I/I <sub>0</sub> ) versus G <sup>2</sup> for <b>1</b> and <b>2</b>                                                                               | S8   |
| Figure S5. UV–Vis spectral changes for the reaction of <b>1</b> in toluene with O <sub>2</sub>                                                                          | S9   |
| Table S2. Mass spectrometric data of the decay products of <b>2</b> and <b>2</b> - <sup>18</sup> O <sub>2</sub>                                                         | S9   |

## Experimental Procedures

**Materials.** All reagents and solvents were purchased from commercial sources and were used as received, unless noted otherwise. Diethyl ether and toluene were deoxygenated by sparging with N<sub>2</sub> and purified by passage through two packed columns of molecular sieves under an N<sub>2</sub> pressure (MBraun solvent purification system). *n*-Pentane was dried over Na and distilled under N<sub>2</sub> prior to use.<sup>1</sup> Preparation and handling of air- and moisture-sensitive materials were carried out under an inert gas atmosphere by using either standard Schlenk and vacuum line techniques or a glovebox. Dioxygen was dried by passage through a short column of Drierite. Isotope-enriched <sup>18</sup>O<sub>2</sub> (97% <sup>18</sup>O) was purchased from Cambridge Isotope Laboratories, Andover, MA, USA. [Ir{PhNC(NMe<sub>2</sub>)NPh}(cod)] (**1**) was synthesized as previously described (cod = 1,5-cyclooctadiene).<sup>2</sup>

**Physical Methods.** NMR spectra were recorded on a Bruker Avance MicroBay 300, Avance 400 or Avance 500 spectrometer at ambient temperature, unless noted otherwise. <sup>1</sup>H, <sup>13</sup>C and <sup>31</sup>P chemical shifts are reported in parts per million (ppm) and were referenced to residual solvent peaks (for <sup>1</sup>H and <sup>13</sup>C NMR spectra) or an external standard [H<sub>3</sub>PO<sub>4</sub> (85%, 0 ppm) for <sup>31</sup>P NMR spectra]. Two-dimensional correlated spectroscopy (COSY) and heteronuclear single-quantum coherence (HSQC) experiments were carried out on a Bruker Avance 500 spectrometer at 25 °C using the gradient versions of the COSY and HSQC pulse sequences, and the data were processed using the TopSpin 2.1 software package. For <sup>1</sup>H,<sup>1</sup>H COSY, typical measurement parameters were as follows: time domain data points (TD), 2048 for TD and 512 for TD1; number of scans (NS), 8; and number of dummy scans (DS), 32. The data were processed with zero-filling to 4096 (TD) and 512 (TD1). For <sup>1</sup>H,<sup>13</sup>C HSQC, typical measurement parameters were as follows: 2048 for TD and 200 for TD1; NS, 16; and DS, 16. The data were processed with zero-filling to 2048 (TD) and 1024 (TD1). The total measurement time for each experiment was approximately 2 h. Self-diffusion coefficients (*D*) were determined from stimulated-echo experiments using bipolar gradients acquired in two-dimensional mode (stebpgp1s). These experiments were performed on a Bruker Avance 400 spectrometer at 25 °C. Prior to each experiment, the diffusion time (delay between the midpoints of the gradients,  $\Delta$ ) and gradient length ( $\delta$ ) were optimized using the one-dimensional version of the pulse sequence (stebpgp1s1d). The data acquisition for each diffusion experiment took approximately 30 min. Data processing and analysis to determine *D* were carried out within the TopSpin 2.1 software package.

IR spectra were recorded on a Bruker Vertex 70 Fourier-transform IR spectrometer using samples prepared by grinding the solid compound with KBr and pressing the mixture into a disk. Low-resolution mass spectral data were acquired on a quadrupole ion trap ThermoFinnigan LCQ Deca mass spectrometer using an electrospray ionization source or on a single quadrupole ThermoFinnigan Voyager mass spectrometer using an electron impact ionization source (equipped with a solids probe). High-resolution mass spectral data were acquired on a time-of-flight Waters GCT Premier mass spectrometer using an electron impact ionization source (equipped with a solids probe). UV–Visible spectra were recorded on an HP 8453A diode array spectrophotometer (Agilent Technologies).

**Generation and Characterization of [Ir{PhNC(NMe<sub>2</sub>)NPh}( $\eta^4$ -cod)( $\eta^2$ -O<sub>2</sub>)] (**2**).** In a typical experiment, a 15–20 mM solution of **1** (4.0–5.4 mg, 0.0075–0.010 mmol) in 0.5 ml of

C<sub>6</sub>D<sub>6</sub> was placed in an NMR tube and purged with O<sub>2</sub>(g) at 20 °C for 40 s. The progress of the reaction was monitored by <sup>1</sup>H NMR spectroscopy. Under these conditions, **1** (bright yellow solution) converted into the intermediate, **2** (pale yellow solution), in about 3 h, and **2** was typically fully decayed (dark green solution) within 12 h after the addition of O<sub>2</sub> to **1**. For quantification, 5 equiv of 1,2-dichloroethane (3.0–3.9 μl, 3.8–4.9 mg, 0.038–0.050 mmol) was added to the solution of **2**, and the yield was estimated by comparing the integrations of the 1,2-dichloroethane (δ, 2.90 ppm) and alkene proton signals (ca. 75%). For IR spectroscopy, 0.15 ml of a solution of **2** was mixed with KBr. The mixture was evaporated to dryness (20 °C, *in vacuo*) and pressed into a disk. For labeling experiments, 5 ml (ca. 0.2 mmol) of <sup>18</sup>O<sub>2</sub> (97% <sup>18</sup>O) was added to a 15–20 mM solution of **1** (0.0075–0.010 mmol) in 0.5 ml of C<sub>6</sub>D<sub>6</sub>.

<sup>1</sup>H NMR (500 MHz, C<sub>6</sub>D<sub>6</sub>, δ): 7.35 (br d, 2H, Ar H), 7.30 (d, *J* = 8.1 Hz, 2H, Ar H), 7.15 (Ar H; this signal partially overlaps with the residual solvent peak), 7.09 (t, *J* = 7.7 Hz, 2H, Ar H), 6.96 (t, *J* = 7.2 Hz, 1H, Ar H), 6.88 (t, *J* = 7.7 Hz, 1H, Ar H), 4.74 (br dt, 1H, =CHCH<sub>2</sub>-), 4.55 (br dt, 1H, =CHCH<sub>2</sub>-), 4.14 (br dt, 1H, =CHCH<sub>2</sub>-), 4.01 (br dt, 1H, =CHCH<sub>2</sub>-), 2.34–2.19 (m, 3H, =CHCH<sub>2</sub>-), 2.17–2.09 (m, 1H, =CHCH<sub>2</sub>-), 2.06–1.98 (m, 1H, =CHCH<sub>2</sub>-), 2.03 (s, 6H, NCH<sub>3</sub>), 1.94–1.88 (m, 1H, =CHCH<sub>2</sub>-), 1.70–1.60 (m, 2H, =CHCH<sub>2</sub>-). <sup>1</sup>H NMR (300 MHz, CDCl<sub>3</sub>, δ): 7.35 (br d, 4H, Ar H), 7.23–7.15 (m, 3H, Ar H), 7.11–7.08 (m, 2H, Ar H), 6.97 (t, *J* = 7.1 Hz, 1H, Ar H), 4.63–4.56 (m, 1H, =CHCH<sub>2</sub>-), 4.53–4.46 (m, 1H, =CHCH<sub>2</sub>-), 4.14–4.05 (m, 1H, =CHCH<sub>2</sub>-), 3.93–3.84 (m, 1H, =CHCH<sub>2</sub>-), 2.69–2.59 (m, 2H, =CHCH<sub>2</sub>-), 2.56 (s, 6H, NCH<sub>3</sub>), 2.54–2.27 (m, 4H, =CHCH<sub>2</sub>-), 2.18–2.05 (m, 2H, =CHCH<sub>2</sub>-). IR (KBr, cm<sup>-1</sup>): 865 (ν<sub>OO</sub>), 575 and 459 (ν<sub>IrO</sub>). IR of **2**-<sup>18</sup>O<sub>2</sub> (KBr, cm<sup>-1</sup>): 813 (ν<sub>OO</sub>), 550 (sh) and 442 (ν<sub>IrO</sub>).

For comparison, <sup>1</sup>H NMR of **1** (300 MHz, C<sub>6</sub>D<sub>6</sub>, δ): 7.12 (t, *J* = 7.4 Hz, 4H, Ar H), 6.83 (t, *J* = 7.4 Hz, 2H, Ar H), 6.77 (d, *J* = 7.3 Hz, 4H, Ar H), 3.90 (br m, 4H, =CHCH<sub>2</sub>-), 2.14 (br m, 4H, =CHCH<sub>2</sub>-), 1.99 (s, 6H, NCH<sub>3</sub>), 1.42 (m, 4H, =CHCH<sub>2</sub>-).

**Reaction of **2** with Triphenylphosphine.** A solution of **2** in C<sub>6</sub>D<sub>6</sub> was prepared as described above (ca. 3 h for the formation of **2**) and then purged with Ar for 5 min to remove excess O<sub>2</sub>. A solution of 0.075–0.100 mmol of PPh<sub>3</sub> (10 equiv with respect to Ir) in 0.2 ml of C<sub>6</sub>D<sub>6</sub> was added to the solution of **2**, and the progress of the reaction was monitored by <sup>31</sup>P NMR spectroscopy. The intermediate was fully decayed within 4 h (pale orange solution). <sup>31</sup>P{<sup>1</sup>H} NMR (121.5 MHz, C<sub>6</sub>D<sub>6</sub>, δ): 25.5 (s, OPPh<sub>3</sub>), -4.4 (s, PPh<sub>3</sub>), -9.1 (s).

**Reaction of the Decay Products of **2** with 1,5-Cyclooctadiene.** A 15–20 mM solution of **1** in C<sub>6</sub>D<sub>6</sub> was purged with O<sub>2</sub> as described above, allowed to stand for at least 16 h, and then purged with Ar for 5 min to remove excess O<sub>2</sub>. After addition of 0.015–0.020 or 0.075–0.100 mmol of cod (2 or 10 equiv with respect to Ir), the solution was kept at 20 °C for 1 d and then heated at 70 °C for 1 d (NMR tube equipped with a J. Young valve). During this time the color of the solution changed from dark green to orange. 4-cycloocten-1-one<sup>3</sup> and **1** were identified as products by <sup>1</sup>H NMR spectroscopy and EIMS. Quantifications (against 1,2-dichloroethane as a standard) were performed in triplicate. The average yields were 0.88 (±0.13) equiv of 4-cycloocten-1-one and 0.30 (±0.05) equiv of **1**. Data for 4-cycloocten-1-one were as follows: <sup>1</sup>H NMR (300 MHz, C<sub>6</sub>D<sub>6</sub>, δ): 5.65 (m, 1H, =CHCH<sub>2</sub>-), 5.37 (m, 1H, =CHCH<sub>2</sub>-), 2.66 (m, 1H, =CHCH<sub>2</sub>-), 2.24 (m, 3H, =CHCH<sub>2</sub>-), 2.10 (m, 2H, =CHCH<sub>2</sub>-), 1.40–1.31 (m, 4H, =CHCH<sub>2</sub>-). EIMS (70 eV) *m/z*: M<sup>+</sup> calcd for C<sub>8</sub>H<sub>12</sub>O, 124.1; found, 124.3 (the expected fragmentation pattern<sup>4</sup> was observed as follows: 109.3, 96.3, 81.3, 67.2, 54.2). For the reaction carried out using <sup>18</sup>O<sub>2</sub>, EIMS (70 eV) *m/z*: 126.3 (M<sup>+</sup>; fragmentation pattern: 111.3, 96.3, 81.3, 67.2, 54.2).

## References

- 1 W. L. F. Armarego and C. L. L. Chai, *Purification of Laboratory Chemicals*, 6th edn., Butterworth-Heinemann, Oxford, U.K., 2009.
- 2 J.-U. Rohde, M. R. Kelley and W.-T. Lee, *Inorg. Chem.*, 2008, **47**, 11461.
- 3 (a) M. P. del Rio, M. A. Ciriano and C. Tejel, *Angew. Chem., Int. Ed.*, 2008, **47**, 2502; (b) M. Faraj, J. Martin, C. Martin, J.-M. Bregeault and J. Mercier, *J. Mol. Catal.*, 1985, **31**, 57.
- 4 NIST/EPA/NIH Mass Spectral Library, data version NIST 98 [CD-ROM]; National Institute of Standards and Technology, U.S. Department of Commerce: Washington, DC, 1998.
- 5 (a) P. S. Pregosin, P. G. A. Kumar and I. Fernandez, *Chem. Rev.*, 2005, **105**, 2977; (b) A. Macchioni, G. Ciancaleoni, C. Zuccaccia and D. Zuccaccia, *Chem. Soc. Rev.*, 2008, **37**, 479.

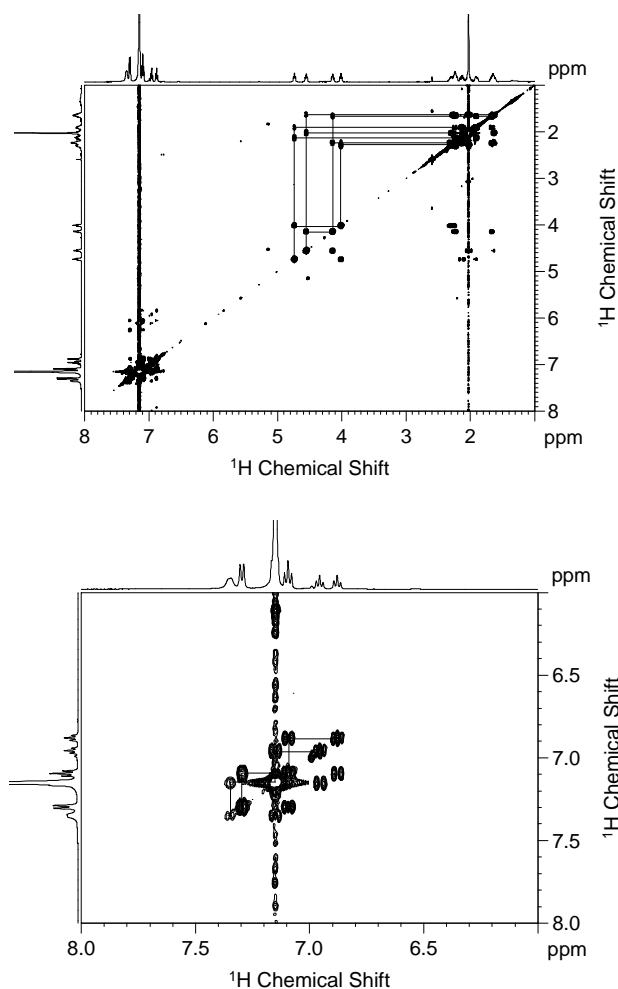

**Figure S1.** Top:  $^1\text{H}$ ,  $^1\text{H}$  COSY spectrum of **2** in benzene- $d_6$  (ca. 15 mM, 500 MHz, 25 °C). The solid lines indicate correlations among alkene proton resonances and between alkene and methylene proton resonances. Bottom: Expanded view of the aromatic region of the  $^1\text{H}$ ,  $^1\text{H}$  COSY spectrum of **2**. The solid lines indicate correlations among aromatic proton resonances.

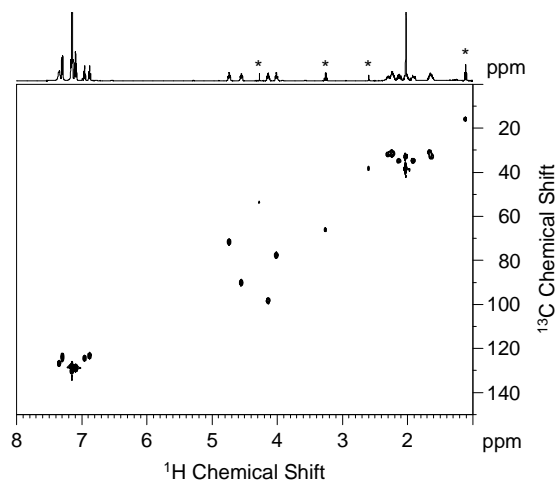

**Figure S2.**  $^1\text{H}$ ,  $^{13}\text{C}$  HSQC spectrum of **2** in benzene- $d_6$  (ca. 15 mM, 500 MHz, 25 °C). The asterisks denote solvent peaks ( $\text{CH}_2\text{Cl}_2$ ,  $\text{Et}_2\text{O}$ , and an unknown contaminant).

**Table S1.**  $^1\text{H}$  and  $^{13}\text{C}$  chemical shifts,  $\delta$  (ppm), from the  $^1\text{H}$ ,  $^{13}\text{C}$  heteronuclear single-quantum coherence (HSQC) spectrum of  $[\text{Ir}\{\text{PhNC}(\text{NMe}_2)\text{NPh}\}(\text{cod})(\text{O}_2)]$  (**2**) in benzene- $d_6$ .

| Assignment           |                         | $\delta(^1\text{H})$ | $\delta(^{13}\text{C})$ |
|----------------------|-------------------------|----------------------|-------------------------|
| Ar                   | Group A                 | 7.35                 | 126.8                   |
|                      |                         | 7.15 <sup>a</sup>    | 128.0 <sup>a</sup>      |
|                      |                         | 6.96                 | 124.4                   |
|                      | Group B                 | 7.30                 | 123.9                   |
|                      |                         | 7.09                 | 128.9                   |
|                      |                         | 6.88                 | 123.3                   |
| =CHCH <sub>2</sub> - | 1-H, C-1                | 4.74                 | 71.7                    |
|                      | 2-H, C-2                | 4.01                 | 77.7                    |
|                      | 5-H, C-5                | 4.55                 | 90.1                    |
|                      | 6-H, C-6                | 4.14                 | 98.3                    |
| =CHCH <sub>2</sub> - | 3-H <sub>ab</sub> , C-3 | 2.31, 2.23           | 32.0                    |
|                      | 4-H <sub>ab</sub> , C-4 | 2.02, 1.63           | 32.8                    |
|                      | 7-H <sub>ab</sub> , C-7 | 2.23, 1.66           | 31.4                    |
|                      | 8-H <sub>ab</sub> , C-8 | 2.13, 1.91           | 34.8                    |
| NCH <sub>3</sub>     |                         | 2.03                 | 38.1                    |

<sup>a</sup> The resonance signals centered at  $\delta(^1\text{H}) = 7.15$  ppm and  $\delta(^{13}\text{C}) = 128.0$  ppm partially overlap with the residual solvent peaks.

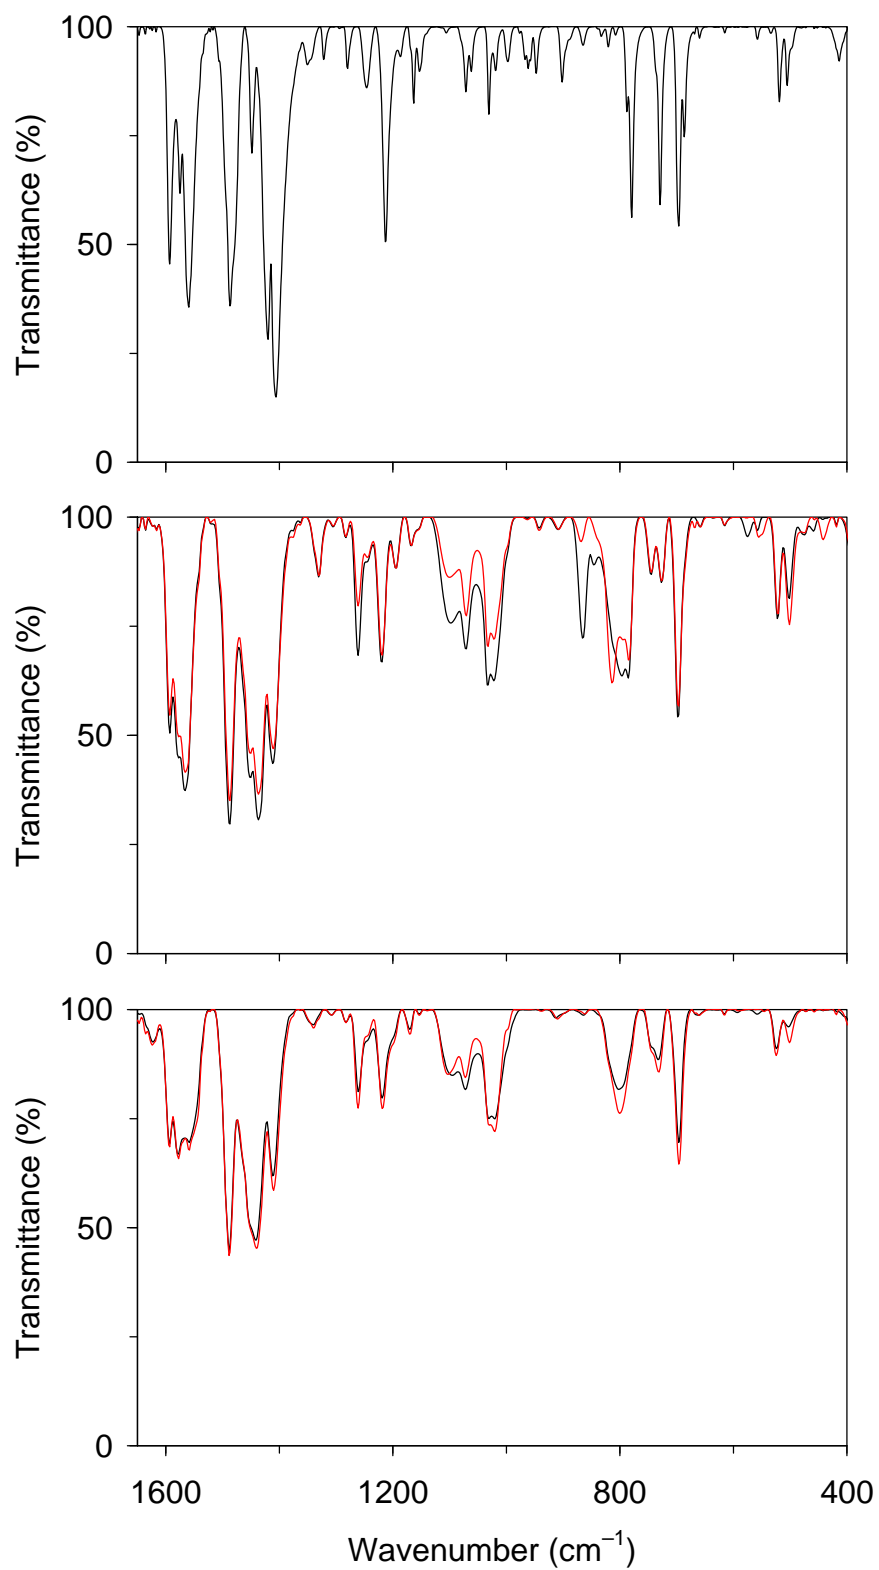

**Figure S3.** Top: IR spectrum of **1** (—, black). Middle: IR spectra of **2** (—, black) and **2**-<sup>18</sup>O<sub>2</sub> (—, red). Bottom: IR spectra of the decay products of **2** (—, black) and **2**-<sup>18</sup>O<sub>2</sub> (—, red).

## Determination of the Self-Diffusion Coefficients of **1** and **2**

Diffusion  $^1\text{H}$  NMR experiments to determine  $D$  values were conducted in triplicate, and, for each experiment, data of six (**1**) or ten (**2**) suitable peaks were averaged. The average  $D$  values from three measurements were  $8.4 (\pm 0.1) \cdot 10^{-10}$  and  $8.2 (\pm 0.3) \cdot 10^{-10} \text{ m}^2 \cdot \text{s}^{-1}$  for **1** and **2**, respectively. Intermediate **2** was found to decay by  $\leq 10\%$  over the course of each measurement, introducing a minor error into  $D$ . Shown below are representative results for the  $\text{NMe}_2$  resonance signals of **1** and **2**. The plots in Figure S4 confirm the expected linear relationship between  $\ln(I/I_0)$  and  $G^{2.5}$ .

SIMFIT RESULTS for **1**

=====

INTENSITY fit : Diffusion : Variable Gradient :  
 $I = I[0] \cdot \exp(-D \cdot \text{SQR}(2 \cdot \text{PI} \cdot \text{gamma} \cdot \text{Gi} \cdot \text{LD}) \cdot (\text{BD} - \text{LD}/3) \cdot 1e4)$   
16 points for Peak 5,  $\text{NMe}_2$  resonance signal  
Converged after 31 iterations!

Results            Comp. 1  
I[0]                = 9.978e-001  
Diff Con.          = 8.569e-010 m2/s  
Gamma              = 4.258e+003 Hz/G  
Little Delta       = 5.000m  
Big Delta          = 26.950m

RSS    = 6.239e-005  
SD     = 1.975e-003

| Point | Gradient   | Expt       | Calc       | Difference  |
|-------|------------|------------|------------|-------------|
| 1     | 6.740e-001 | 1.000e+000 | 9.960e-001 | -3.970e-003 |
| 2     | 2.765e+000 | 9.691e-001 | 9.686e-001 | -4.901e-004 |
| 3     | 4.855e+000 | 9.107e-001 | 9.107e-001 | -4.593e-005 |
| 4     | 6.945e+000 | 8.262e-001 | 8.276e-001 | 1.404e-003  |
| 5     | 9.036e+000 | 7.252e-001 | 7.271e-001 | 1.921e-003  |
| 6     | 1.113e+001 | 6.158e-001 | 6.175e-001 | 1.712e-003  |
| 7     | 1.322e+001 | 5.040e-001 | 5.069e-001 | 2.941e-003  |
| 8     | 1.531e+001 | 4.006e-001 | 4.023e-001 | 1.717e-003  |
| 9     | 1.740e+001 | 3.086e-001 | 3.087e-001 | 8.304e-005  |
| 10    | 1.949e+001 | 2.308e-001 | 2.289e-001 | -1.889e-003 |
| 11    | 2.158e+001 | 1.663e-001 | 1.641e-001 | -2.139e-003 |
| 12    | 2.367e+001 | 1.159e-001 | 1.138e-001 | -2.183e-003 |
| 13    | 2.576e+001 | 7.857e-002 | 7.621e-002 | -2.354e-003 |
| 14    | 2.785e+001 | 5.113e-002 | 4.936e-002 | -1.762e-003 |
| 15    | 2.994e+001 | 3.254e-002 | 3.090e-002 | -1.641e-003 |
| 16    | 3.203e+001 | 2.010e-002 | 1.870e-002 | -1.395e-003 |

=====

SIMFIT RESULTS for **2**

=====

INTENSITY fit : Diffusion : Variable Gradient :  
 $I = I[0] \cdot \exp(-D \cdot \text{SQR}(2 \cdot \text{PI} \cdot \text{gamma} \cdot \text{Gi} \cdot \text{LD}) \cdot (\text{BD} - \text{LD} / 3) \cdot 1e4)$   
16 points for Peak 9, NMe2 resonance signal  
Converged after 34 iterations!

Results      Comp. 1  
I[0]            = 9.960e-001  
Diff Con.      = 8.577e-010 m2/s  
Gamma          = 4.258e+003 Hz/G  
Little Delta   = 5.000m  
Big Delta      = 26.950m

RSS    = 1.151e-004  
SD     = 2.682e-003

| Point | Gradient   | Expt       | Calc       | Difference  |
|-------|------------|------------|------------|-------------|
| 1     | 6.740e-001 | 1.000e+000 | 9.942e-001 | -5.792e-003 |
| 2     | 2.765e+000 | 9.694e-001 | 9.669e-001 | -2.516e-003 |
| 3     | 4.855e+000 | 9.074e-001 | 9.089e-001 | 1.526e-003  |
| 4     | 6.945e+000 | 8.232e-001 | 8.260e-001 | 2.794e-003  |
| 5     | 9.036e+000 | 7.220e-001 | 7.255e-001 | 3.568e-003  |
| 6     | 1.113e+001 | 6.119e-001 | 6.161e-001 | 4.200e-003  |
| 7     | 1.322e+001 | 5.039e-001 | 5.057e-001 | 1.837e-003  |
| 8     | 1.531e+001 | 4.014e-001 | 4.013e-001 | -1.201e-004 |
| 9     | 1.740e+001 | 3.087e-001 | 3.078e-001 | -8.452e-004 |
| 10    | 1.949e+001 | 2.295e-001 | 2.282e-001 | -1.347e-003 |
| 11    | 2.158e+001 | 1.656e-001 | 1.636e-001 | -2.039e-003 |
| 12    | 2.367e+001 | 1.156e-001 | 1.133e-001 | -2.217e-003 |
| 13    | 2.576e+001 | 7.865e-002 | 7.590e-002 | -2.750e-003 |
| 14    | 2.785e+001 | 5.168e-002 | 4.914e-002 | -2.536e-003 |
| 15    | 2.994e+001 | 3.256e-002 | 3.075e-002 | -1.810e-003 |
| 16    | 3.203e+001 | 2.018e-002 | 1.860e-002 | -1.572e-003 |

=====

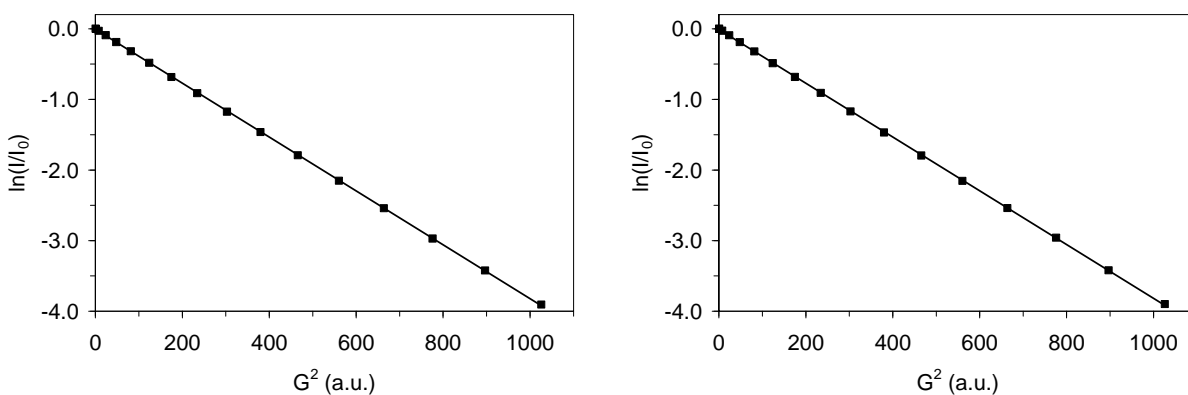

**Figure S4.** Plots of the natural logarithm of the intensity quotient,  $\ln(I/I_0)$ , versus the square of the gradient strength,  $G^2$ , for the NMe<sub>2</sub> resonance signals of **1** (left;  $R^2 = 0.99996$ ) and **2** (right;  $R^2 = 0.99995$ ).



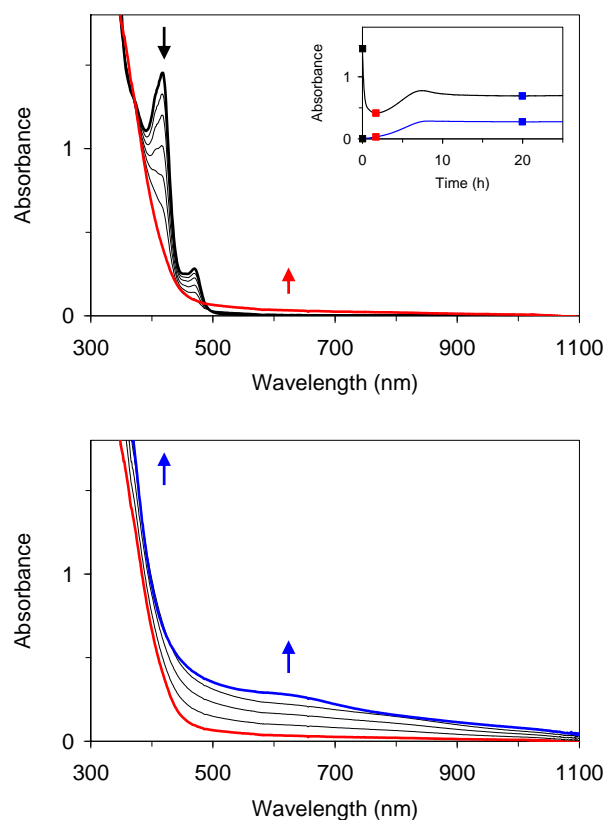

**Figure S5.** Reaction of 2 mM **1** in toluene with O<sub>2</sub> at 20 °C as monitored by electronic absorption spectroscopy (path length, 0.5 cm). Top: Decay of **1** (—, black) to afford intermediate **2** (—, red; *t* = 1.7 h). Bottom: Decay of **2** (—, red) to afford the product solution (—, blue; *t* = 20 h). Inset (top): Time course of the reaction of **1** with O<sub>2</sub> [ $\lambda$  = 417 nm (—, black) and 630 nm (—, blue)]. The squares indicate the reaction times associated with the spectra shown (black, **1**; red, **2**; and blue, decay products of **2**).

**Table S2.** Mass-to-charge ratios (*m/z*) from the electrospray ionization (ESI) and electron impact (EI) mass spectra of the decay products of [Ir{PhNC(NMe<sub>2</sub>)NPh}(cod)(O<sub>2</sub>)] (**2**).<sup>a-c</sup>

| Complex                                | ESI(+)/MS             |                                             |                               |                              | EIMS                                        |                                  |
|----------------------------------------|-----------------------|---------------------------------------------|-------------------------------|------------------------------|---------------------------------------------|----------------------------------|
|                                        | {LH + H} <sup>+</sup> | { <b>2</b> - O <sub>2</sub> H} <sup>+</sup> | { <b>2</b> - OH} <sup>+</sup> | { <b>2</b> - H} <sup>+</sup> | { <b>2</b> - H <sub>2</sub> O} <sup>+</sup> | {IrL <sub>3</sub> } <sup>+</sup> |
| Found                                  | 240.2                 | 538.3                                       | 554.2                         | 570.1                        | 553.1712                                    | 907.3577                         |
| Calcd                                  | 240.2                 | 538.2                                       | 554.2                         | 570.2                        | 553.1705                                    | 907.3662                         |
| Found ( <sup>18</sup> O <sub>2</sub> ) | 240.2                 | 538.4                                       | 556.3                         | 574.3                        | 555.4                                       | 907.5                            |

<sup>a</sup> The reaction of [Ir{PhNC(NMe<sub>2</sub>)NPh}(cod)] (**1**) with O<sub>2</sub> (or <sup>18</sup>O<sub>2</sub>) was carried out as described in the Experimental Procedures Section, and the resulting solution was allowed to stand for at least 16 h. <sup>b</sup> LH = PhN=C(NMe<sub>2</sub>)NHPPh.

<sup>c</sup> High-resolution mass spectral data are reported with four decimal places.
